# Supplementary material for: Anti-cancer drug 3,3′-diindolylmethane activates Wnt4 signaling to enhance gastric cancer cell stemness and tumorigenesis
Source: PubMed Central journal article supplement (PMC4941316; doi:10.18632/oncotarget.7684), 2016-02-24
Supplement: oncotarget-07-16311-s001.pdf [file oncotarget-07-16311-s001.pdf]

# Anti-cancer drug 3,3'-diindolylmethane activates Wnt4 signaling to enhance gastric cancer cell stemness and tumorigenesis

## Supplementary materials

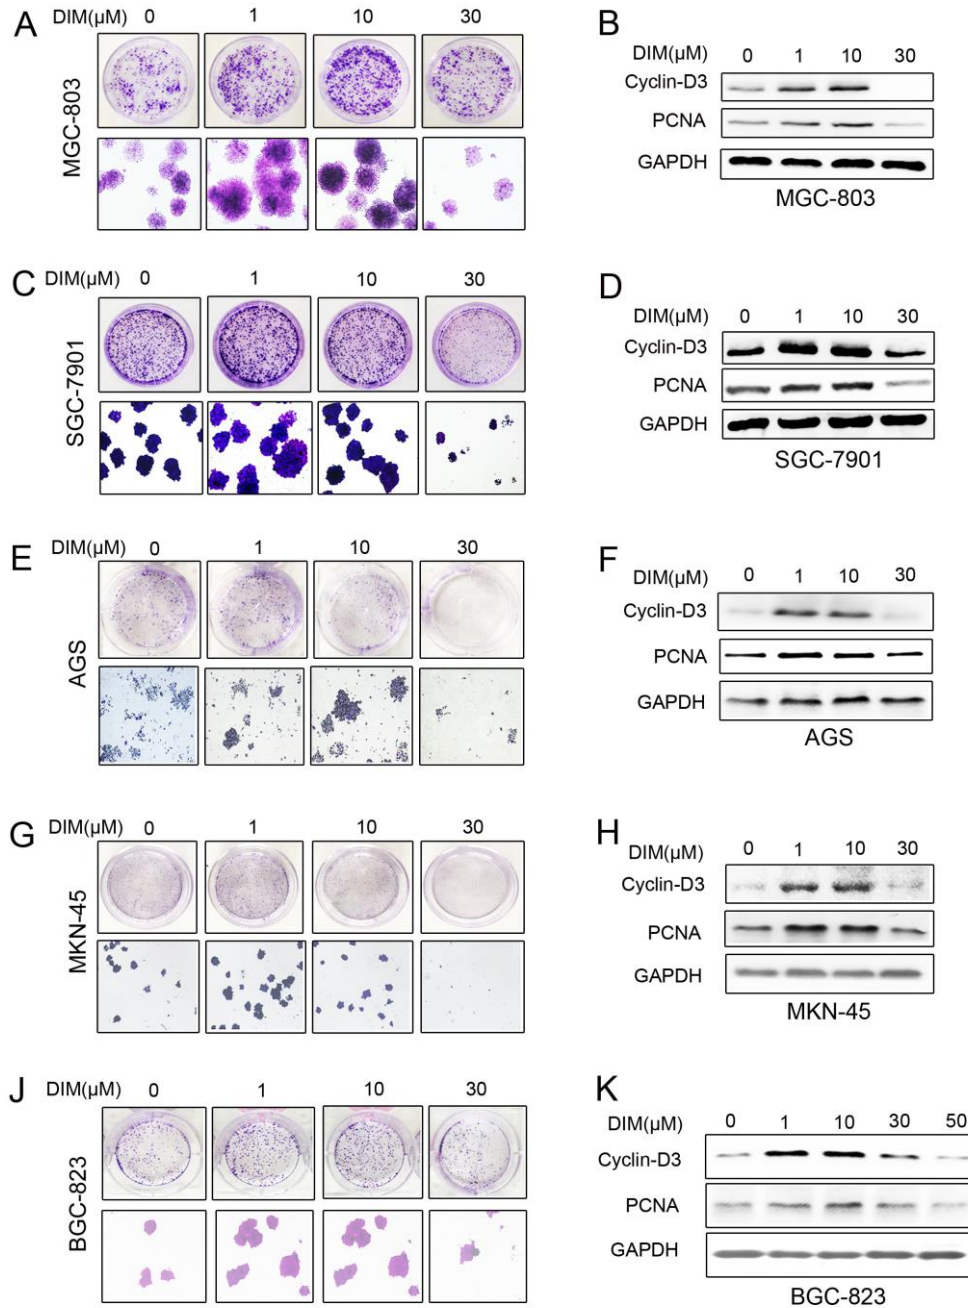

Supplementary Figure 1. **Low level of DIM promoted gastric cancer cells proliferation**

(A, C, E, G, J) Representative images of colony formation in MGC-803, SGC-7901,

AGS, MKN-45 and BGC-823 cells treated with 0 $\mu$ M, 1 $\mu$ M , 10 $\mu$ M and 30 $\mu$ M DIM. Original magnification, 40X. (B, D, F, H, K) Western blot assay for the expression of Cyclin-D3 and PCNA proteins in MGC-803, SGC-7901, AGS, MKN-45 and BGC-823 cells treated with 0 $\mu$ M, 1 $\mu$ M , 10 $\mu$ M and 30 $\mu$ M DIM for 48h.

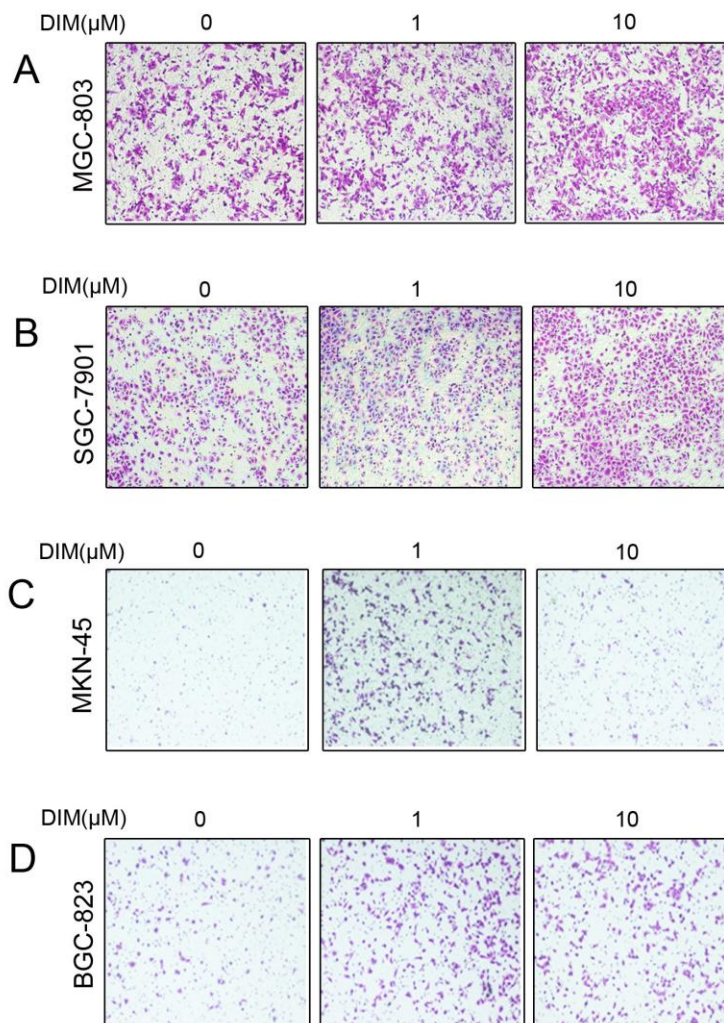

Supplementary Figure 2. **Low level of DIM promoted gastric cancer cells migration**

(A, B, C, D) The migratory ability of MGC-803, SGC-7901, MKN-45 and BGC-823 cells treated with 0 $\mu$ M, 1 $\mu$ M and 10 $\mu$ M DIM for 48h was evaluated by transwell migration assay. Original magnification, 100X.

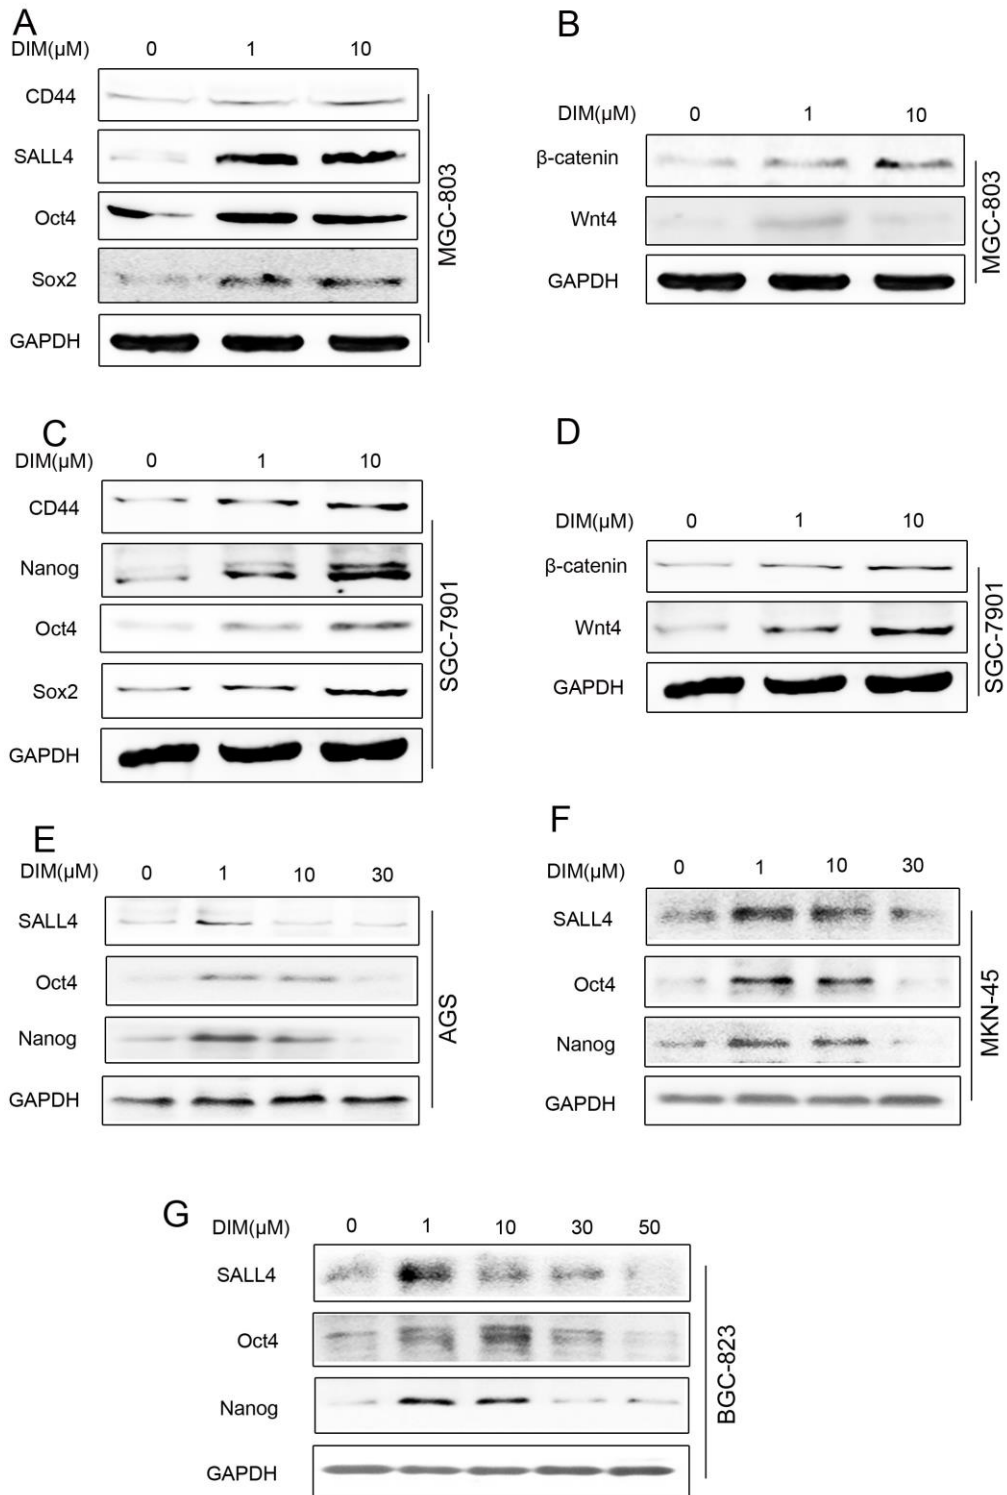

Supplementary Figure 3. **Low level of DIM enhanced gastric cancer cells stemness through Wnt4/ $\beta$ -catenin pathway**

(A, C, E, F, G) Western blot for the expression of stemness proteins in MGC-803, SGC-7901, AGS, MKN-45 and BGC-823 cells treated with 0 $\mu$ M, 1 $\mu$ M and 10 $\mu$ M DIM for 48h. (B, D) Western blot for the expression of Wnt4 and  $\beta$ -catenin proteins in MGC-803 and SGC-7901 cells treated with 0 $\mu$ M, 1 $\mu$ M and 10 $\mu$ M DIM for 48h.

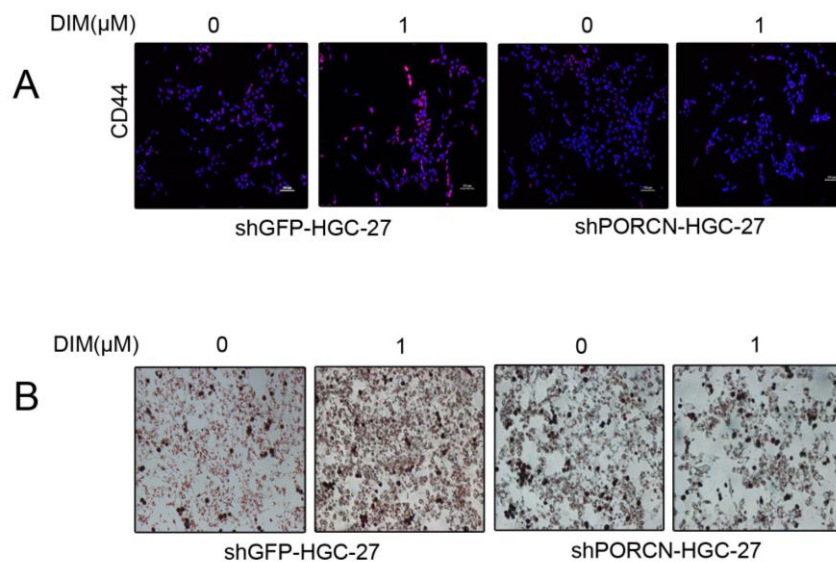

**Supplementary Figure 4. Low level of DIM enhanced stemness of gastric cancer cells through inducing Wnt autocrine to activate  $\beta$ -catenin pathway**

(A) Immunofluorescent staining of CD44 in shGFP-HGC-27 and shPORCN-HGC-27 cells treated with 0 $\mu$ M or 1 $\mu$ M DIM for 48h. Original magnification, 200X. (B) Adipogenic differentiation of shGFP-HGC-27 and shPORCN-HGC-27 cells after treatment with 0 $\mu$ M and 1 $\mu$ M DIM for 48h. Original magnification, 200X.

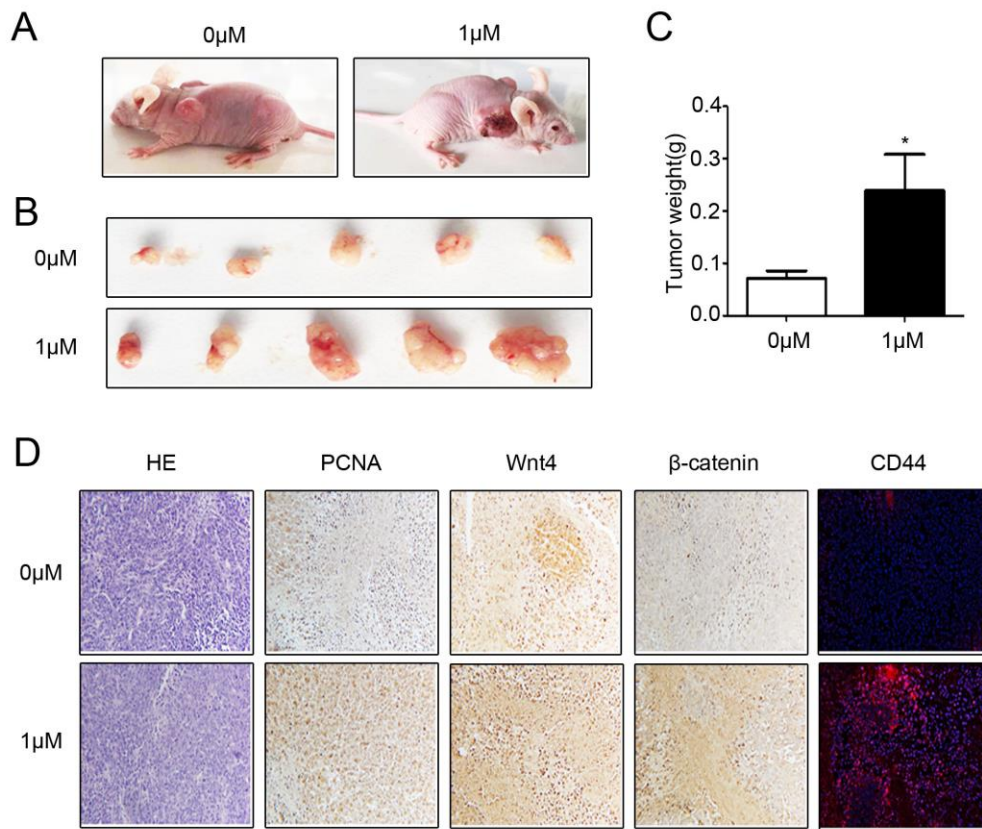

Supplementary Figure 5. **Low level of DIM promoted gastric cancer growth *in vivo*** (A) Representative images of tumor-bearing mice. (B) The photograph of excised tumors at 30 days post inoculation. (C) Tumor weight was evaluated in mice transplanted with MGC-803 cells that were treated with 0μM or 1μM DIM for 48h (n=5, \* $P < 0.05$  ). (D) The subcutaneous tumors derived from MGC-803 cells treated with 0μM (upper) and 1μM DIM (lower) was subjected to H&E staining, immunohistochemical staining of PCNA, Wnt4 and β-catenin, immunofluorescent analyses of CD44 expression. Original magnification, 200X.

Supplementary Table 1. Primer Sequences

| mRNA             | Primer         | Sequences(5'-3')      | Annealing temperature |
|------------------|----------------|-----------------------|-----------------------|
| Human-Oct4       | Forward primer | TTGAGGCTCTGCAGCTTAG   | 60°C                  |
|                  | Reverse primer | GCCGGTACAGAACCACAC    |                       |
| Human-SALL4      | Forward primer | TCGATGGCCAACTTCCTTC   | 62°C                  |
|                  | Reverse primer | GAGCGGACTCACACTGGAGA  |                       |
| Human-Sox2       | Forward primer | ACACCAATCCCATCCACACT  | 60°C                  |
|                  | Reverse primer | GCAAACCTCCTGCAAAGCTC  |                       |
| Human-WNT1       | Forward primer | GATCGTCAACCGAGGCTGTC  | 64°C                  |
|                  | Reverse primer | CGTGCAGGATTCGATGGAAC  |                       |
| Human-WNT2       | Forward primer | AGCTGGCAGGAAGGCTGTAA  | 63°C                  |
|                  | Reverse primer | CAGCCAGCATGTCCTGAGAG  |                       |
| Human-WNT3       | Forward primer | GGCGCCTCTTCTAATGGA    | 60°C                  |
|                  | Reverse primer | AGAAGCGCAGTTGCTTGG    |                       |
| Human-WNT3a      | Forward primer | GGCATGATCTCCACGTAGTT  | 63°C                  |
|                  | Reverse primer | TACTCCTCTGCAGCCTGAAG  |                       |
| Human-WNT4       | Forward primer | GCGAGCAACTGGCTGTACCT  | 64°C                  |
|                  | Reverse primer | AGGTTCCGCTTGCACATCTG  |                       |
| Human-WNT5a      | Forward primer | CTCGCCATGAAGAAGTCCA   | 59°C                  |
|                  | Reverse primer | TACCTAGCGACCACCAAGAA  |                       |
| Human-WNT6       | Forward primer | GACGCATCCTGCAACAGGAC  | 65°C                  |
|                  | Reverse primer | AGCAGCTCGCCATAGAACA   |                       |
| Human-WNT7b      | Forward primer | CGAAGCGGAACTGGTACTGG  | 64°C                  |
|                  | Reverse primer | TGAAGCTCGGAGCACTGTCA  |                       |
| Human-WNT10b     | Forward primer | GGCGCCAGGTGGTAACTGAA  | 66°C                  |
|                  | Reverse primer | GCTCCAGAATTGCGGTTGTG  |                       |
| Human-WNT11      | Forward primer | ACAAGACAGGCAGTGCAACA  | 61°C                  |
|                  | Reverse primer | ACGTAGCAGCACCAGTGGTA  |                       |
| Human-PORCN      | Forward primer | TGCCATGTCACGGTGTCTAC  | 61°C                  |
|                  | Reverse primer | TACCTCGTGCTGTTCTCTG   |                       |
| Human-Snail      | Forward primer | GCGAGCTGCAGGACTCTAAT  | 60°C                  |
|                  | Reverse primer | GCCTCCAAGGAAGAGACTGA  |                       |
| Human-N-cadherin | Forward primer | AGTCAACTGCAACCGTGTCT  | 60°C                  |
|                  | Reverse primer | AGTCAACTGCAACCGTGTCT  |                       |
| Human-β-actin    | Forward primer | CACGAAACTACCTTCAACTCC | 56°C                  |
|                  | Reverse primer | CATACTCCTGCTTGCTGATC  |                       |
